# Supplementary material for: Fabrication of silver chalcogenolate cluster hybrid membranes with enhanced structural stability and luminescence efficiency
Source: Royal Society of Chemistry journal article supplement (doi:10.1039/c9cc07797a), 2019-01-01
Supplement: c9cc07797a1.pdf [file c9cc07797a1.pdf]

## Supporting Information

# **Fabrication of silver chalcogenolate clusters hybrid membranes with enhanced structural stability and luminescence efficiency**

Yi-Man Wang, ‡<sup>a</sup> Jiang-Wei Zhang, †<sup>b</sup> Qian-You Wang, <sup>a</sup> Hai-Yang Li, <sup>a</sup> Xi-Yan Dong, <sup>a,c</sup> Shan Wang\*<sup>a</sup> and Shuang-Quan Zang\*<sup>a</sup>

<sup>a</sup> *College of Chemistry and Molecular Engineering, Zhengzhou University, Zhengzhou 450001, P.R. China*

<sup>b</sup> *State Key Laboratory of Catalysis, Dalian Institute of Chemical Physics, Chinese Academy of Sciences (CAS) Dalian 116023, P.R. China*

<sup>c</sup> *Henan Polytechnic University, College of Chemistry and Chemical Engineering, Jiaozuo, CN 454000*

E-mail: [shanwang@zzu.edu.cn](mailto:shanwang@zzu.edu.cn); [zangsqzg@zzu.edu.cn](mailto:zangsqzg@zzu.edu.cn)

**Table of Contents.**

**S1. Chemicals and Materials.**

**S2. Measurements.**

**S3. Methods.**

**S3.1. Synthesis of ligand (NH<sub>2</sub>-bpz).**

**S3.2. Synthesis of NH<sub>2</sub>-Ag<sub>12</sub>bpz crystal.**

**S3.3. Synthesis of nano-NH<sub>2</sub>-Ag<sub>12</sub>bpz.**

**S3.4. Synthesis of nano-MA-Ag<sub>12</sub>bpz.**

**S3.5. Preparation of membrane.**

**S3.6. Nitrobenzene detection by Ag<sub>12</sub>bpz membrane.**

**S4. Crystallographic data of NH<sub>2</sub>-Ag<sub>12</sub>bpz.**

**S5. Supplementary Figures.**

## **S1. Chemicals and Materials.**

Triethylene glycol dimethacrylate (TEGDMA), 2-methacrylic anhydride (MA), P(Cy)<sub>3</sub> and 2,5-dibromoaniline were purchased from Saan Chemical Technology (Shanghai) Co., Ltd. Butyl methacrylate (BMA) and Phenylbis(2,4,6-trimethylbenzoyl)phosphine oxide were supplied by J&K Chemical Technology (Beijing) Co., Ltd. Pyridine-4-boronic acid and Pd<sub>2</sub>(DBA)<sub>3</sub> were purchased from Beijing HWRK Chem Co., Ltd. All reagents are of analytical grade and can be used directly after purchase. AgS<sup>t</sup>Bu was prepared by reaction of equivalent amounts of AgO and HS<sup>t</sup>Bu in the presence of Et<sub>3</sub>N.

## S2. Measurements.

Single-crystal X-ray diffraction (SCXRD) was performed on a Rigaku XtaLAB Pro diffractometer using Cu K $\alpha$  radiation ( $\lambda = 1.54184 \text{ \AA}$ ). Powder X-ray diffraction (PXRD) were collected on a Rigaku D/Max-2500PC X-ray diffractometer with Cu sealed tub ( $\lambda = 1.54178 \text{ \AA}$ ). Morphology of all samples were carried out using Zeiss Sigma 500 on a scanning electron microscopy (SEM) measurement. The photoluminescence (PL) emission spectra were measured by using a Horiba FluoroLog<sup>-3</sup> spectrofluorometer. The membrane was prepared by employing the CEL-M500/350 mercury lamp source purchased from Beijing China Education Au-light Co., Ltd. FTIR spectra were recorded in the 400-4000  $\text{cm}^{-1}$  region on an Alpha Centaur FT/IR spectrophotometer (KBr pellets). <sup>1</sup>H nuclear magnetic resonance (NMR) spectra were recorded on a Bruker DRX spectrometer operating at 400 MHz. <sup>13</sup>C NMR spectra were recorded on a Bruker DRX spectrometer operating at 600 MHz in DMSO. For liquid <sup>13</sup>C NMR test, approximately 20 mg of nano-NH<sub>2</sub>-Ag<sub>12</sub>bpz, nano-MA-Ag<sub>12</sub>bpz and Ag<sub>12</sub>bpz membrane were degraded in d<sub>6</sub>-DMSO with one drop of HCl, respectively. Luminescence decay profiles were measured on HORIBA Scientific Fluorolog<sup>-3</sup> spectrofluorometer equipped with phosphor lamp, operating in time-correlated single photon counting mode (TCSPC) with a resolution time of 200 ps.

### S3. Methods.

#### S3.1. Synthesis of ligand (NH<sub>2</sub>-bpz).

The ligand 1,4-bis(pyrid-4-yl)benzenamine (NH<sub>2</sub>-bpz) was synthesized according to the previous report.<sup>1</sup>

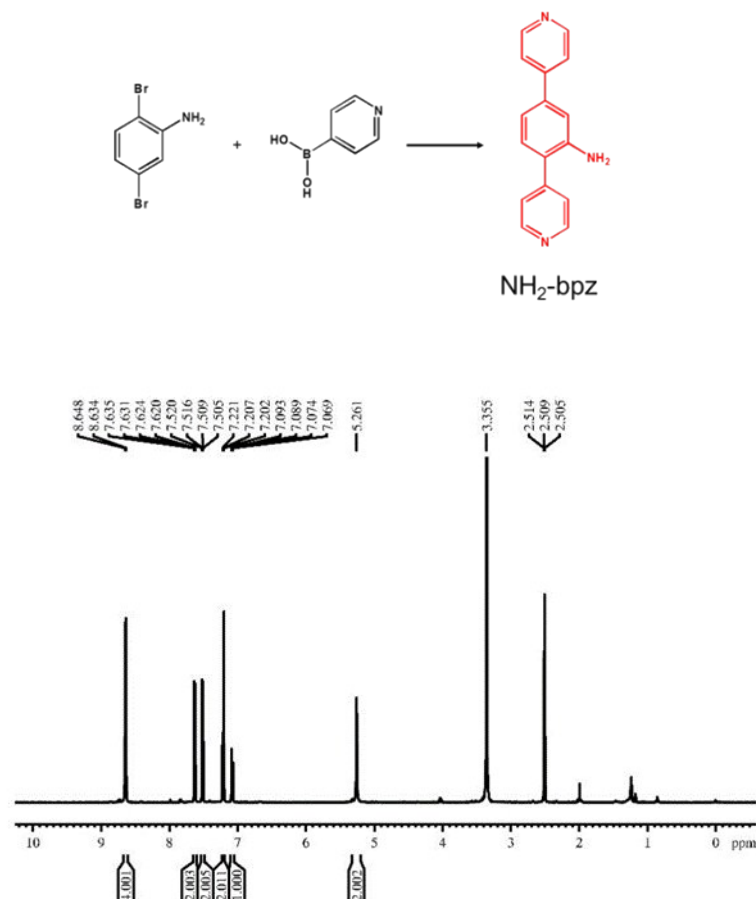

**Figure S1.** <sup>1</sup>H NMR of NH<sub>2</sub>-bpz. (400 MHz, DMSO): δ 8.6, d, 4H; 7.6, q, 2H; 7.5, t, 2H; 7.2, t, 2H; 7.0, q, 1H; 5.2, s, 2H.

#### S3.2. Synthesis of NH<sub>2</sub>-Ag<sub>12</sub>bpz crystal.

AgS<sup>t</sup>Bu (20 mg, 0.1 mmol) and CF<sub>3</sub>COOAg (22 mg, 0.1 mmol) were dissolved in N,N-dimethylacetamide (DMAc, 3 mL), followed by a mixture of NH<sub>2</sub>-bpz (20 mg, 0.08 mmol) with 1 mL DMAc being added into the above solution. The obtained mixture was slowly evaporated in air for 10 min. The resultant NH<sub>2</sub>-Ag<sub>12</sub>bpz crystals were collected with 68.54 % yield based on NH<sub>2</sub>-bpz.

#### S3.3. Synthesis of nano-NH<sub>2</sub>-Ag<sub>12</sub>bpz.

Nanocrystals of NH<sub>2</sub>-Ag<sub>12</sub>bpz (nano-NH<sub>2</sub>-Ag<sub>12</sub>bpz) were prepared by stirring method. AgS<sup>t</sup>Bu

(20 mg, 0.1 mmol) and  $\text{CF}_3\text{COOAg}$  (22 mg, 0.1 mmol) was first dissolved in 3 mL DMAc, the resulting solution was then added dropwise to a solution consisting of 20 mg  $\text{NH}_2\text{-bpz}$  and 1 mL DMAc. Under vigorous stirring for 1 min, the pale yellow product was obtained by filtration.

#### **S3.4. Synthesis of nano-MA- $\text{Ag}_{12}\text{bpz}$ .**

Nano- $\text{NH}_2\text{-Ag}_{12}\text{bpz}$  (20 mg) were soaked in the mixture solution of 2-methacrylate anhydride (MA, 14.7  $\mu\text{L}$ ) and dichloromethane ( $\text{CH}_2\text{Cl}_2$ , 1 mL) for 2 days at room temperature. Afterwards, nano-MA- $\text{Ag}_{12}\text{bpz}$  was obtained and separated by filtration.

#### **S3.5. Preparation of membrane.**

##### **S3.5.1. Preparation of $\text{Ag}_{12}\text{bpz}$ membrane.**

TEGDMA (100  $\mu\text{L}$ ), BMA (100  $\mu\text{L}$ ) and phenylbis-(2,4,6-trimethylbenzoyl) phosphine oxide (0.8 mg) were uniformly mixed together, and then different amounts of nano-MA- $\text{Ag}_{12}\text{bpz}$  were added into the mixture under sonication until the solutions were well-dispersed. The resulting suspension was dripped into a glass plate, and another glass slide was covered over the suspension. The interfacial polymerization was occurred upon irradiated by the UV-lamp source. After 5 min, the obtained  $\text{Ag}_{12}\text{bpz}$  membrane can be easily peeled off from the glass slide.

##### **S3.5.2. Preparation of $\text{NH}_2\text{-Ag}_{12}\text{bpz}$ membrane.**

The nano- $\text{NH}_2\text{-Ag}_{12}\text{bpz}$  (35.3 mg) were dispersed in the mixture of TEGDMA (100  $\mu\text{L}$ ), BMA (100  $\mu\text{L}$ ) and phenylbis-(2,4,6-trimethylbenzoyl) phosphine oxide (0.8 mg), and formed a homogeneous suspension. Through the same photo-polymerization method mentioned above, we obtained the  $\text{NH}_2\text{-Ag}_{12}\text{bpz}$  membrane

##### **S3.5.3. Preparation of $\text{Ag}_{12}$ membrane.**

The  $\text{Ag}_{12}$  membrane was obtained by directly mixing  $\text{Ag}_{12}$  clusters (22.2 mg) particles with BMA (100  $\mu\text{L}$ ) and TEGDMA (100  $\mu\text{L}$ ) in the presence of phenylbis-(2,4,6-trimethylbenzoyl) phosphine oxide (0.8 mg), then via the same photo-polymerization method.

### **S3.6. Nitrobenzene detection by Ag<sub>12</sub>bpz membrane.**

#### **S3.6.1. Liquid phase detection.**

We prepared a solution of nitrobenzene with the concentration ranging from 1  $\mu$ M to 10  $\mu$ M. And then the NB solution were dripped onto the Ag<sub>12</sub>bpz membrane. During the fluorescence measurements, the samples were excited at 454 nm.

#### **S3.6.2. Vapor-phase detection.**

2 mL of nitrobenzene solution was placed in a capped glass vial for a week to ensure that the equilibrated vapor pressure of nitrobenzene was reached. To conduct a test, the Ag<sub>12</sub>bpz membrane were put into the vial for a specified time for exposure to the NB vapors, and then taken out quickly to measure the corresponding fluorescence spectra.

For the cycle test, after each luminescence quenching by NB, Ag<sub>12</sub>bpz membrane was vacuumed at 40 °C for 5 hours, then used for the next round of testing.

#### S4. Crystallographic data of NH<sub>2</sub>-Ag<sub>12</sub>bpz.

Table S1. Crystal data and structure refinements.

| <b>NH<sub>2</sub>-Ag<sub>12</sub>bpz</b>          |                                                                                                                 |
|---------------------------------------------------|-----------------------------------------------------------------------------------------------------------------|
| CCDC number                                       | 1956711                                                                                                         |
| <b>Empirical formula</b>                          | C <sub>84</sub> H <sub>96</sub> Ag <sub>12</sub> F <sub>18</sub> N <sub>12</sub> O <sub>12</sub> S <sub>6</sub> |
| <b>Formula weight</b>                             | 3294.51                                                                                                         |
| <b>Temperature / K</b>                            | 293(2)                                                                                                          |
| <b>Crystal system</b>                             | hexagonal                                                                                                       |
| <b>Space group</b>                                | P6/mmm                                                                                                          |
| <b><i>a</i> / Å</b>                               | 23.5654(5)                                                                                                      |
| <b><i>b</i> / Å</b>                               | 23.5654(5)                                                                                                      |
| <b><i>c</i> / Å</b>                               | 11.2007(3)                                                                                                      |
| <b><i>α</i> / °</b>                               | 90                                                                                                              |
| <b><i>β</i> / °</b>                               | 90                                                                                                              |
| <b><i>γ</i> / °</b>                               | 120                                                                                                             |
| <b>Volume / Å<sup>3</sup></b>                     | 5386.7(3)                                                                                                       |
| <b><i>Z</i></b>                                   | 1.00008                                                                                                         |
| <b><i>ρ</i><sub>calc</sub> g / cm<sup>3</sup></b> | 1.016                                                                                                           |
| <b><i>μ</i> / mm<sup>-1</sup></b>                 | 9.477                                                                                                           |
| <b>F(000)</b>                                     | 1602.0                                                                                                          |
| <b>Crystal size / mm<sup>3</sup></b>              | 0.2 × 0.05 × 0.01                                                                                               |
| <b>Radiation</b>                                  | Cu Kα (λ = 1.54184)                                                                                             |
| <b>2θ range for data collection / °</b>           | 4.33 to 132.98                                                                                                  |
| <b>Index ranges</b>                               | -16 ≤ <i>h</i> ≤ 28, -27 ≤ <i>k</i> ≤ 19, -13 ≤ <i>l</i> ≤ 9                                                    |
| <b>Reflections collected</b>                      | 18296                                                                                                           |
| <b>Independent reflections</b>                    | 1779 [R <sub>int</sub> = 0.0419, R <sub>sigma</sub> = 0.0220]                                                   |
| <b>Data / restraints / parameters</b>             | 1779 / 48 / 107                                                                                                 |
| <b>Goodness-of-fit on F<sup>2</sup></b>           | 1.099                                                                                                           |
| <b>Final R indexes [<i>I</i> ≥ 2σ (<i>I</i>)]</b> | R <sub>1</sub> = 0.0896, wR <sub>2</sub> = 0.2569                                                               |
| <b>Final R indexes [all data]</b>                 | R <sub>1</sub> = 0.0959, wR <sub>2</sub> = 0.2665                                                               |
| <b>Largest diff. peak/hole / e Å<sup>-3</sup></b> | 1.71/-0.69                                                                                                      |

$$R_1 = \sum | |F_o| - |F_c| | / \sum |F_o| \quad . \quad wR_2 = [\sum w(F_o^2 - F_c^2)^2 / \sum w(F_o^2)^2]^{1/2}$$



## S5. Supplementary Figures.

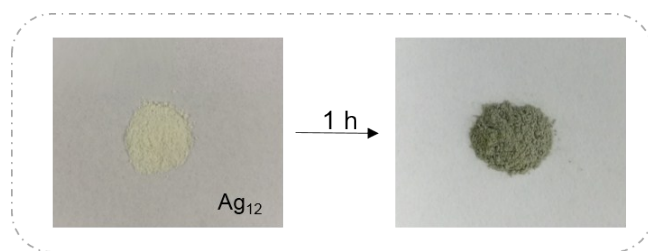

**Figure S2.** Photographs of Ag<sub>12</sub> clusters before and after exposure in air for 1 hour.

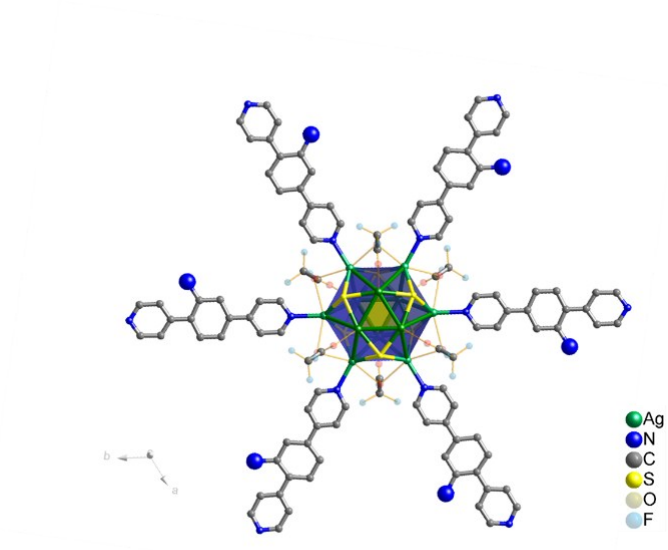

**Figure S3.** Single crystal structure of NH<sub>2</sub>-Ag<sub>12</sub>bpz.

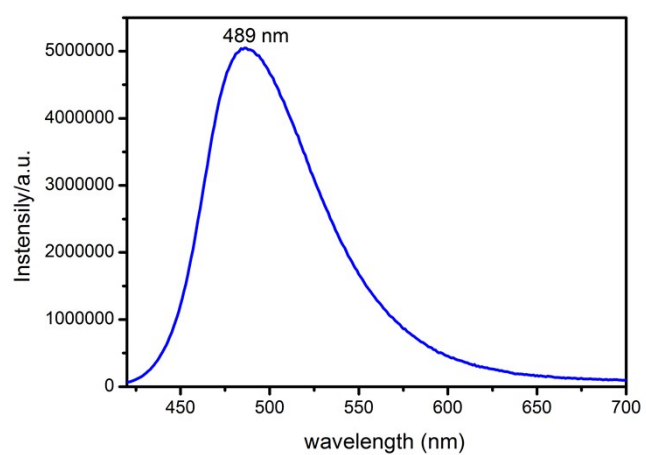

**Figure S4.** Fluorescence emission spectra of NH<sub>2</sub>-Ag<sub>12</sub>bpz (single crystals).

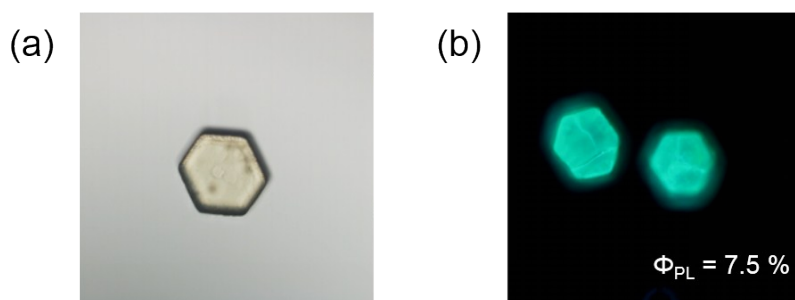

**Figure S5.** Optical microscope images of  $\text{NH}_2\text{-Ag}_{12}\text{bpz}$  (single crystals) (a) under normal light and (b) under UV light.

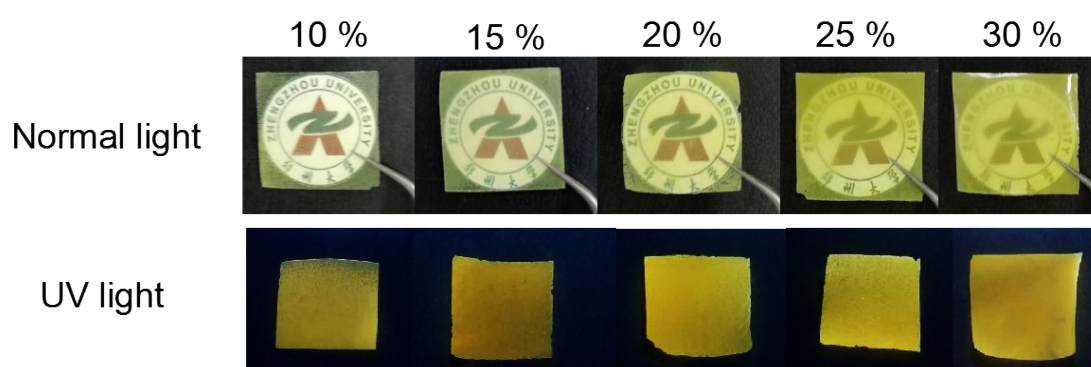

**Figure S6.** Photographs of  $\text{Ag}_{12}\text{bpz}$  membrane loaded with increasing (left-to-right) concentrations of nano-MA- $\text{Ag}_{12}\text{bpz}$  under normal light and UV light.

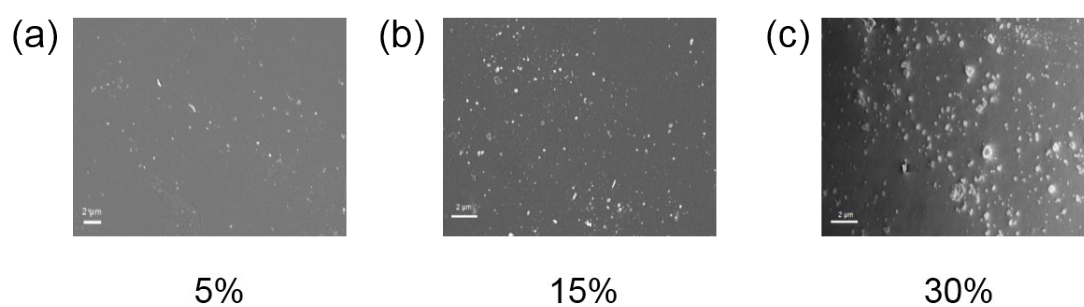

**Figure S7.** SEM images  $\text{Ag}_{12}\text{bpz}$  membrane with different loadings (a) 5%, (b) 15%, and (c) 30%.

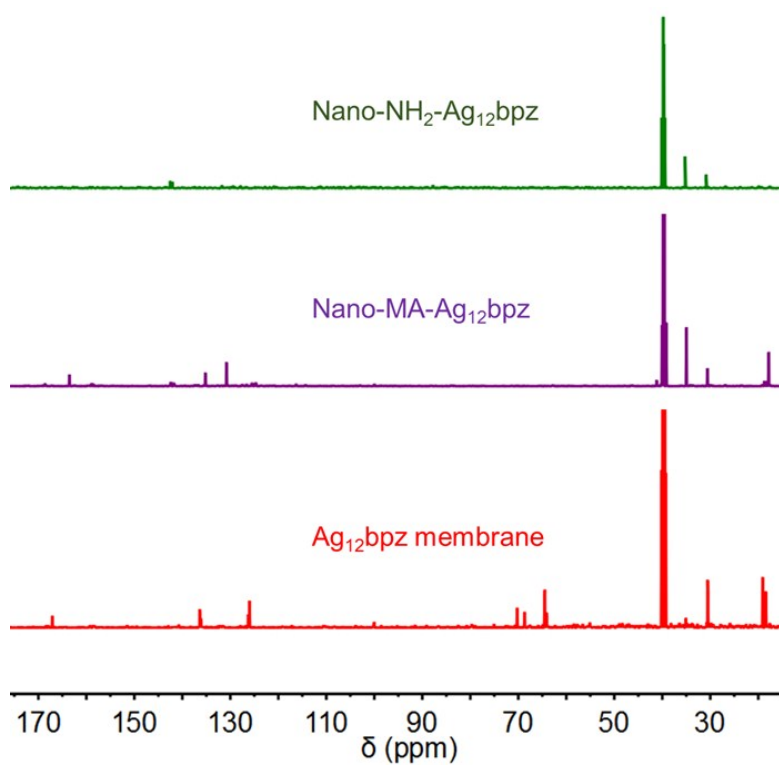

**Figure S8.**  $^{13}\text{C}$  NMR spectrum of nano- $\text{NH}_2\text{-Ag}_{12}\text{bpz}$ , nano- $\text{MA-Ag}_{12}\text{bpz}$  and  $\text{Ag}_{12}\text{bpz}$  membrane in  $\text{d}_6\text{-DMSO}$ .

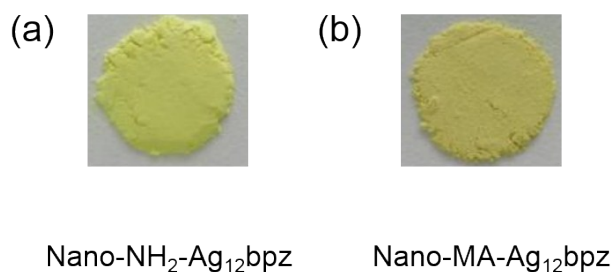

**Figure S9.** Photographs of (a) nano- $\text{NH}_2\text{-Ag}_{12}\text{bpz}$  and (b) nano- $\text{MA-Ag}_{12}\text{bpz}$  under normal light.

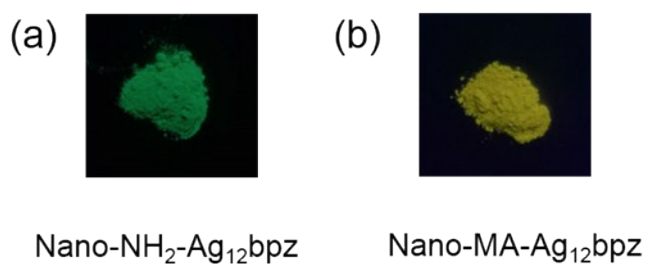

**Figure S10.** Photographs of (a) nano- $\text{NH}_2\text{-Ag}_{12}\text{bpz}$  and (b) nano- $\text{MA-Ag}_{12}\text{bpz}$  under UV light.

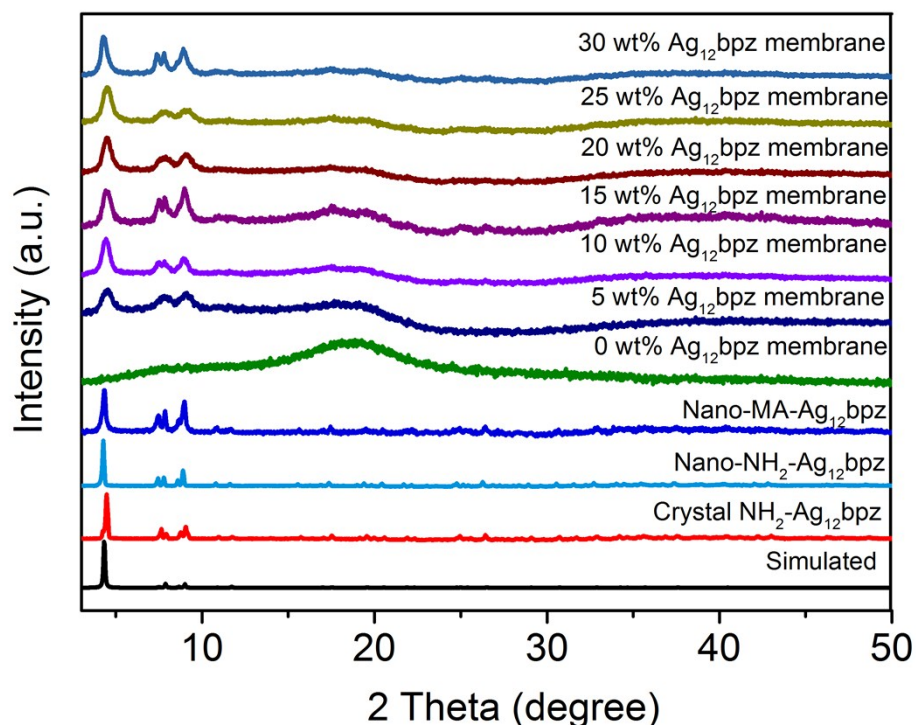

**Figure S11.** PXRD patterns of simulated NH<sub>2</sub>-Ag<sub>12</sub>bpz, single crystal of NH<sub>2</sub>-Ag<sub>12</sub>bpz, nano-NH<sub>2</sub>-Ag<sub>12</sub>bpz, nano-MA-Ag<sub>12</sub>bpz and Ag<sub>12</sub>bpz membrane with different Ag<sub>12</sub>bpz loading.

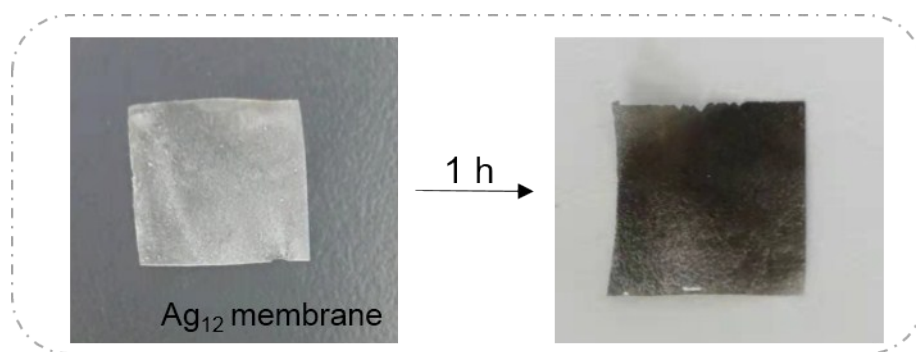

**Figure S12.** Corresponding photographs before and after exposure of Ag<sub>12</sub> membrane in air for 1 hour.

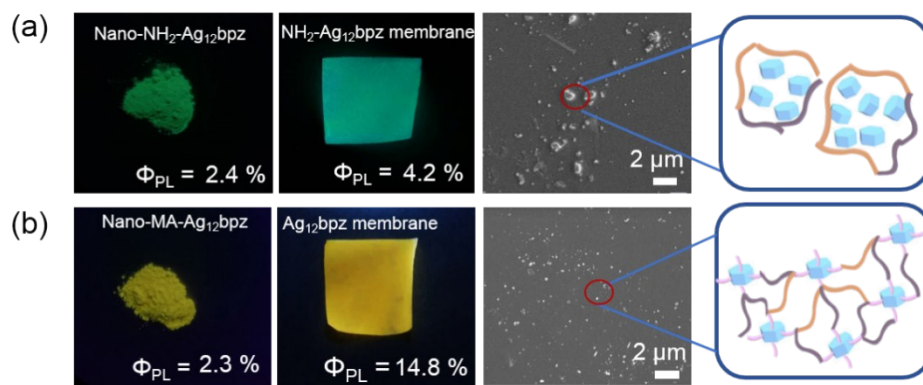

**Figure S13.** Photographs of nano-NH<sub>2</sub>-Ag<sub>12</sub>bpz, NH<sub>2</sub>-Ag<sub>12</sub>bpz membrane, nano-MA-Ag<sub>12</sub>bpz and Ag<sub>12</sub>bpz membrane under 365 nm UV light as well as their corresponding SEM images.

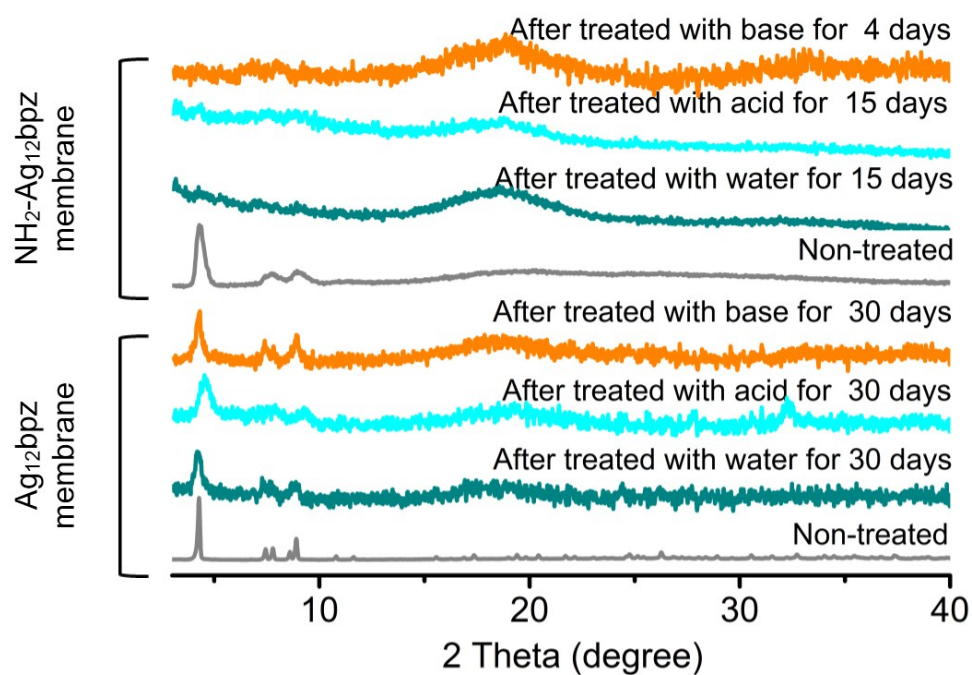

**Figure S14.** PXRD patterns of Ag<sub>12</sub>bpz membrane and NH<sub>2</sub>-Ag<sub>12</sub>bpz membrane upon treated by water, base and acid with different time.

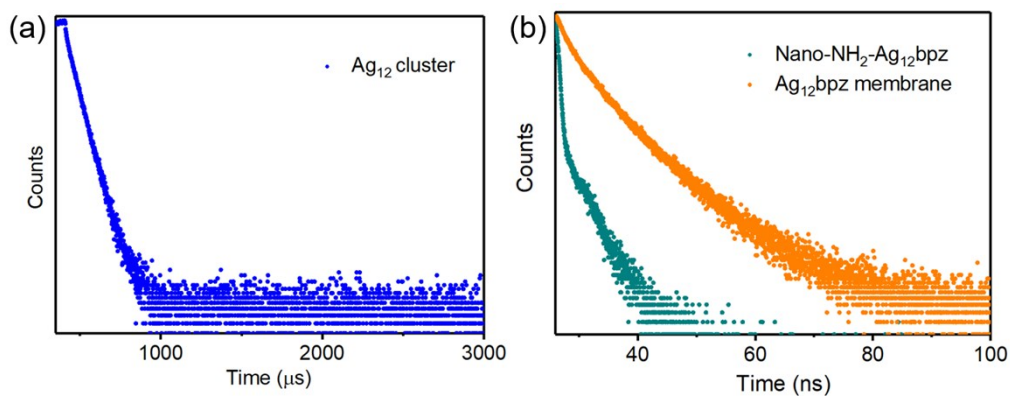

**Figure S15.** Time-resolved fluorescence-decay profiles of (a) Ag<sub>12</sub> cluster, (b) nano-NH<sub>2</sub>-Ag<sub>12</sub>bpz and Ag<sub>12</sub>bpz membrane.

Ag<sub>12</sub> cluster showed a lifetime of 5.7 μs, which can be attributed to the metal-centered transitions. On the other hand, due to the luminescence mainly derived from the ligand-centered emission, nano-NH<sub>2</sub>-Ag<sub>12</sub>bpz and Ag<sub>12</sub>bpz membrane exhibited nanoseconds lifetime. It is worth mention that the lifetime of Ag<sub>12</sub>bpz membrane (4.6 ns) is longer than nano-NH<sub>2</sub>-Ag<sub>12</sub>bpz (0.44 ns). The relatively slower exciton energy release of Ag<sub>12</sub>bpz membrane can be accounts for the covalent linkages between nanocrystal and polymer binder, which effectively restricted Ag<sub>12</sub>bpz moieties motions in the polymer matrix.

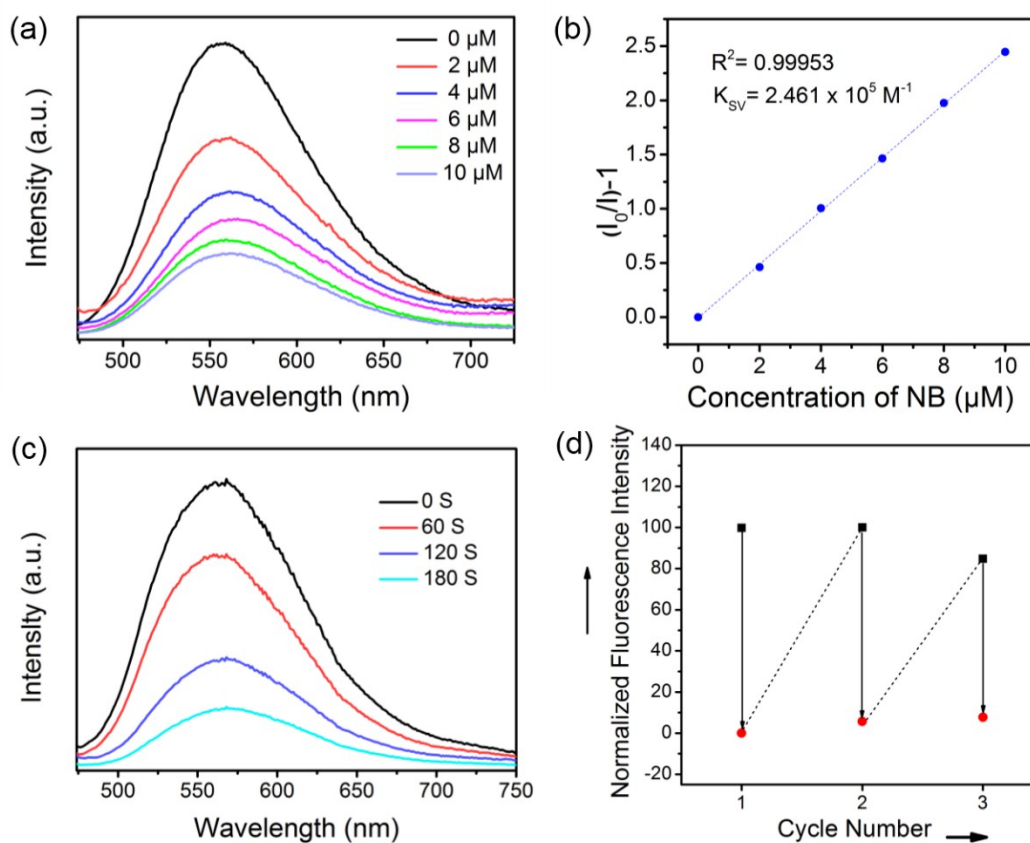

**Figure S16.** (a) Fluorescence spectra showing response on the incremental addition of the solution of NB on Ag<sub>12</sub>bpz membrane. (b) SV plot with the addition of NB to 10 μM. (c) Fluorescence intensity changes of Ag<sub>12</sub>bpz membranes exposed to nitrobenzene vapor at different time. (d) Cycling test of the Ag<sub>12</sub>bpz membrane upon exposure to vapors of NB.

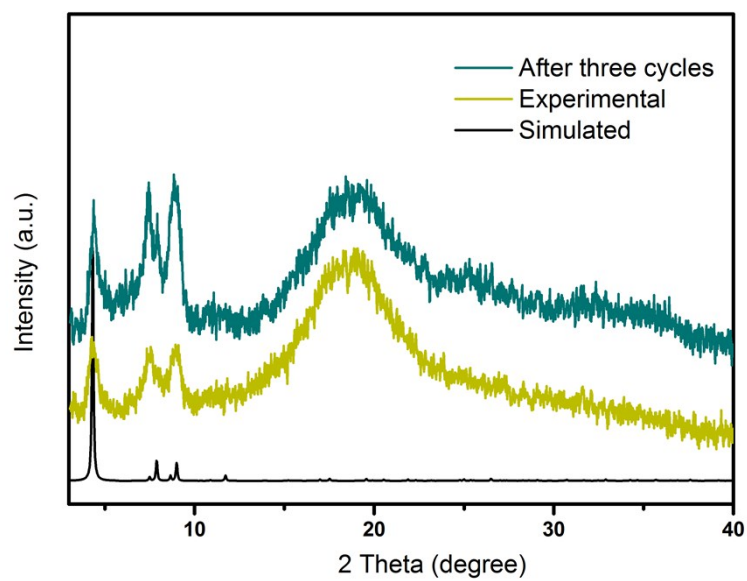

**Figure S17.** PXRD patterns of  $\text{Ag}_{12}\text{bpz}$  membrane before and after exposure to the NB vapor for three cycles.

- 1 X. G. Guo, Z. Y. Zhang, S. Qiu, X. Su, Y. B. Wang and X. Sun, *Chem. Eur. J.*, 2017, **23**, 17727-17733.
